# Supplementary material for: Relevance of a Hypersaline Sodium-Rich Naturally Sparkling Mineral Water to the Protection against Metabolic Syndrome Induction in Fructose-Fed Sprague-Dawley Rats: A Biochemical, Metabolic, and Redox Approach
Source: PubMed Central journal article supplement (PMC3941211; doi:10.1155/2014/384583), 2014-02-05
Supplement: 384583.f1.pdf [file 384583.f1.pdf]

Cidália Dionísio Pereira, Milton Severo, João Ricardo Araújo, João Tiago Guimarães, Diogo Pestana, Alejandro Santos, Rita Ferreira, António Ascensão, José Magalhães, Isabel Azevedo, Rosário Monteiro, Maria João Martins. Relevance of a hypersaline sodium-rich naturally sparkling mineral water to the protection against Metabolic Syndrome induction in fructose-fed Sprague-Dawley rats: a biochemical, metabolic and redox approach.

*Longitudinal statistical analysis* and area under curve results for all parameters evaluated over the dietary intervention with 10% fructose, either in tap water or in natural mineral-rich water.

**Supplementary Table 1.** Interaction terms ( $\beta$ ), estimated by mixed-effects model with random effect in the intercept, for *longitudinal statistical analysis* of body weight and food and fluid ingestions.

| Interaction terms ( $\beta$ ) estimated by mixed-effects model with random effect in the intercept |           |          |                    |           |          |                      |           |          |
|----------------------------------------------------------------------------------------------------|-----------|----------|--------------------|-----------|----------|----------------------|-----------|----------|
| Body weight (g)                                                                                    | $\beta$   | <i>P</i> | Food ingestion (g) | $\beta$   | <i>P</i> | Fluid ingestion (mL) | $\beta$   | <i>P</i> |
| CONT                                                                                               | reference |          | CONT               | reference |          | CONT                 | reference |          |
| FRUCT                                                                                              | 7.4218    | < 0.001  | FRUCT              | -0.0357   | 0.8699   | FRUCT                | -1.0663   | 0.6015   |
| FRUCTMIN                                                                                           | 6.2925    | < 0.001  | FRUCTMIN           | -0.4677   | 0.0334   | FRUCTMIN             | 5.0085    | 0.0151   |
| FRUCT                                                                                              | reference |          | FRUCT              | reference |          | FRUCT                | reference |          |
| FRUCTMIN                                                                                           | -1.1293   | 0.3229   | FRUCTMIN           | -0.4320   | 0.0766   | FRUCTMIN             | 6.0748    | 0.0034   |

CONT: control; FRUCT: 10% fructose in tap water; FRUCTMIN: 10% fructose in natural mineral-rich water.

**Supplementary Table 2.** Area under the curve (AUC) values for all parameters evaluated over the dietary intervention.

|                                                              | AUC   |       |          | Ratios of AUC  |                   |                    |
|--------------------------------------------------------------|-------|-------|----------|----------------|-------------------|--------------------|
|                                                              | CONT  | FRUCT | FRUCTMIN | FRUCT/<br>CONT | FRUCTMIN<br>/CONT | FRUCTMIN<br>/FRUCT |
| <b>Body weight (g)</b>                                       | 4671  | 4808  | 4975     | 1.029          | 1.065             | 1.035              |
| <b>Food ingestion (g)</b>                                    | 86.29 | 58.51 | 66.21    | 0.6781         | 0.7673            | 1.132              |
| <b>Fluid ingestion (mL)</b>                                  | 240.2 | 819.4 | 806.9    | 3.411          | 3.359             | 0.9847             |
| <b>% Energy supplied by<br/>fluid/total energy ingestion</b> |       | 448.0 | 435.5    |                |                   | 0.9721             |
| <b>Total energy ingestion (kcal)</b>                         | 267.5 | 509.1 | 528.0    | 1.903          | 1.974             | 1.037              |
| <b>Urinary volume<br/>(mL/24h)</b>                           | 140.6 | 586.0 | 528.9    | 4.168          | 3.762             | 0.9026             |
| <b>Urinary sodium excretion<br/>(mEq/24h)</b>                | 5.033 | 5.941 | 15.54    | 1.180          | 3.088             | 2.616              |
| <b>Urinary creatinine excretion<br/>(mg/24h)</b>             | 135.5 | 134.1 | 138.2    | 0.9897         | 1.020             | 1.031              |
| <b>Systolic blood pressure<br/>(mm Hg)</b>                   | 977.5 | 1042  | 1030     | 1.066          | 1.054             | 0.9885             |
| <b>Diastolic blood pressure<br/>(mm Hg)</b>                  | 683.2 | 726.6 | 704      | 1.064          | 1.030             | 0.9689             |
| <b>Heart rate (beats/min)</b>                                | 2692  | 2923  | 2830     | 1.086          | 1.051             | 0.9682             |

CONT: control; FRUCT: 10% fructose in tap water; FRUCTMIN: 10% fructose in natural mineral-rich water. Results presented without standard error of the mean, as in M. Bialer, T. Shekh-Ahmad, T. L. Braun, and M. B. Halvorsen, "Comparative steady-state pharmacokinetic evaluation of immediate-release topiramate and USL255, a once-daily extended-release topiramate formulation," *Epilepsia* vol. 54, no. 8, pp. 1444-1452, 2013.

**Supplementary Table 3.** Interaction terms ( $\beta$ ), estimated by mixed-effects model with random effect in the intercept, for *longitudinal statistical analysis* of percentage energy supplied by fluid/total energy ingestion and total energy ingestion.

| <b>Interaction terms (<math>\beta</math>) estimated by mixed-effects model with random effect in the intercept</b> |                           |                 |                                      |                           |                 |
|--------------------------------------------------------------------------------------------------------------------|---------------------------|-----------------|--------------------------------------|---------------------------|-----------------|
| <b>% Energy supplied by fluid/total energy ingestion</b>                                                           | <b><math>\beta</math></b> | <b><i>P</i></b> | <b>Total energy ingestion (kcal)</b> | <b><math>\beta</math></b> | <b><i>P</i></b> |
|                                                                                                                    |                           |                 | <b>CONT</b>                          | <b>reference</b>          |                 |
|                                                                                                                    |                           |                 | <b>FRUCT</b>                         | <b>-1.0726</b>            | <b>0.2344</b>   |
|                                                                                                                    |                           |                 | <b>FRUCTMIN</b>                      | <b>0.0182</b>             | <b>0.9839</b>   |
| <b>FRUCT</b>                                                                                                       | <b>reference</b>          |                 | <b>FRUCT</b>                         | <b>reference</b>          |                 |
| <b>FRUCTMIN</b>                                                                                                    | <b>1.5899</b>             | <b>0.1473</b>   | <b>FRUCTMIN</b>                      | <b>1.0908</b>             | <b>0.2979</b>   |

CONT: control; FRUCT: 10% fructose in tap water; FRUCTMIN: 10% fructose in natural mineral-rich water.

**Supplementary Table 4.** Interaction terms ( $\beta$ ), estimated by mixed-effects model with random effect in the intercept, for *longitudinal statistical analysis* of urine volume and urinary sodium and creatinine excretions.

| Interaction terms ( $\beta$ ) estimated by mixed-effects model with random effect in the intercept |           |          |                                             |           |          |                                                |           |          |
|----------------------------------------------------------------------------------------------------|-----------|----------|---------------------------------------------|-----------|----------|------------------------------------------------|-----------|----------|
| Urine volume<br>(mL/24h)                                                                           | $\beta$   | <i>P</i> | Urinary<br>sodium<br>excretion<br>(mEq/24h) | $\beta$   | <i>P</i> | Urinary<br>creatinine<br>excretion<br>(mg/24h) | $\beta$   | <i>P</i> |
| CONT                                                                                               | reference |          | CONT                                        | reference |          | CONT                                           | reference |          |
| FRUCT                                                                                              | -2.0059   | 0.1242   | FRUCT                                       | -0.0112   | 0.7673   | FRUCT                                          | 0.4324    | 0.1255   |
| FRUCTMIN                                                                                           | 3.5520    | 0.0070   | FRUCTMIN                                    | 0.0534    | 0.1633   | FRUCTMIN                                       | 0.5046    | 0.0748   |
| FRUCT                                                                                              | reference |          | FRUCT                                       | reference |          | FRUCT                                          | reference |          |
| FRUCTMIN                                                                                           | 5.5578    | < 0.001  | FRUCTMIN                                    | 0.0650    | 0.1605   | FRUCTMIN                                       | 0.0665    | 0.7941   |

CONT: control; FRUCT: 10% fructose in tap water; FRUCTMIN: 10% fructose in natural mineral-rich water.

**Supplementary Table 5.** Interaction terms ( $\beta$ ), estimated by mixed-effects model with random effect in the intercept, for *longitudinal statistical analysis* of systolic and diastolic blood pressure and heart rate.

| Interaction terms ( $\beta$ ) estimated by mixed-effects model with random effect in the intercept |           |          |                         |           |          |                           |           |          |
|----------------------------------------------------------------------------------------------------|-----------|----------|-------------------------|-----------|----------|---------------------------|-----------|----------|
| Systolic BP<br>(mm Hg)                                                                             | $\beta$   | <i>P</i> | Diastolic BP<br>(mm Hg) | $\beta$   | <i>P</i> | Heart rate<br>(beats/min) | $\beta$   | <i>P</i> |
| CONT                                                                                               | reference |          | CONT                    | reference |          | CONT                      | reference |          |
| FRUCT                                                                                              | 0.7598    | 0.0042   | FRUCT                   | 0.2438    | 0.1948   | FRUCT                     | 1.2247    | 0.1274   |
| FRUCTMIN                                                                                           | 0.4875    | 0.0469   | FRUCTMIN                | 0.3347    | 0.0572   | FRUCTMIN                  | 1.5640    | 0.0377   |
| FRUCT                                                                                              | reference |          | FRUCT                   | reference |          | FRUCT                     | reference |          |
| FRUCTMIN                                                                                           | -0.2758   | 0.2611   | FRUCTMIN                | 0.0949    | 0.6324   | FRUCTMIN                  | 0.3547    | 0.6706   |

CONT: control; FRUCT: 10% fructose in tap water; FRUCTMIN: 10% fructose in natural mineral-rich water.
